## Decreased TPD52 expression is associated with poor prognosis in primary hepatocellular carcinoma

Ying Wang<sup>1,3,\*</sup>, Chang-Long Chen<sup>1,\*</sup>, Qiu-Zhong Pan<sup>1</sup>, Ying-Yuan Wu<sup>4</sup>, Jing-Jing Zhao<sup>1</sup>, Shan-Shan Jiang<sup>1</sup>, Jie Chao<sup>3</sup>, Xiao-Fei Zhang<sup>1</sup>, Hong-Xia Zhang<sup>1</sup>, Zi-Qi Zhou<sup>1</sup>, Yan Tang<sup>1</sup>, Xu-Qiong Huang<sup>3</sup>, Jian-Hua Zhang<sup>2</sup> and Jian-Chuan Xia<sup>1</sup>

<sup>1</sup> Collaborative Innovation Center for Cancer Medicine, State Key Laboratory of Oncology in South China, Sun Yat-Sen University Cancer Center, Guangzhou, China

<sup>2</sup> Department of Health Service Management, Guangzhou University of Chinese Medicine, Guangzhou, China

<sup>3</sup> Department of Epidemiology and Health Statistics, Guangdong Key Laboratory of Molecular Epidemiology, Guangdong Pharmaceutical University, Guangzhou, China

<sup>4</sup> Department of Gynaecology and Obstetrics, Panyu Branch of Armed Police Corps Hospital of Guangdong, Guangzhou, China

\* These authors have contributed equally to this work

Correspondence to: Jian-Chuan Xia, email: xiajch@mail.sysu.edu.cn

Jian-Hua Zhang, email: zhangjh1962@hotmail.com

**Keywords:** TPD52, hepatocellular carcinoma, prognosis, tumor suppressor, mechanism

**Received:** May 26, 2015

**Accepted:** October 22, 2015

**Published:** November 13, 2015

This is an open-access article distributed under the terms of the Creative Commons Attribution License, which permits unrestricted use, distribution, and reproduction in any medium, provided the original author and source are credited.

### ABSTRACT

**Tumor protein D52 (TPD52) has been indicated to be involved in tumorigenesis of various malignancies. But its role in hepatocellular carcinoma (HCC) is unknown. This study aimed to explore the expression of TPD52 in HCC samples and cell lines using real-time quantitative PCR, western blotting, and immunohistochemistry. The prognostic value of TPD52 in HCC was also analysed. Meanwhile, the mechanism of TPD52 in hepatocarcinogenesis was further investigated by western blotting, immunohistochemistry, over-express and knockdown studies. We found that TPD52 expression was significantly decreased in the HCC tissues and HCC cell lines. TPD52 expression was significantly correlated with tumor-nodes-metastasis (TNM) stage. Kaplan–Meier survival curves showed that high TPD52 expression was associated with improved overall survival (OS) and disease-free survival (DFS) in HCC patients. Multivariate analysis indicated that TPD52 expression was an independent prognostic marker for the OS and DFS of patients. In addition, TPD52 expression was positively correlated with p21 and p53 expression, and was negatively correlated with MDM2, BCL2 and P-GSK-3 $\beta$  expression in HCC. In conclusions, our findings suggested that TPD52 is a potential tumor suppressor in HCC. It may be a novel prognostic biomarker and molecular therapy target for HCC.**

### INTRODUCTION

Hepatocellular carcinoma (HCC) is the fifth most prevalent neoplasm and the third most frequent cause of cancer-related death [1]. Most HCC cases (80%) are in eastern Asia and sub-Saharan Africa, where the main risk factor is chronic hepatitis B virus (HBV) infection, together with exposure to aflatoxin B1 [2]. Currently, surgical resection is the first-line treatment for HCC; however, it is usually limited by many factors, such as

liver dysfunction, patient condition, and multifocality [3, 4]. Therefore, this has given rise to various alternative treatments for HCC, including percutaneous ethanol injection, radiofrequency ablation therapy, and transarterial chemoembolization [5]. As HCC is not sensitive to conventional chemotherapy or radiotherapy, adjuvant immunotherapy might benefit patients with HCC who undergo resection, as any residual tumor would probably be minimal. Unfortunately, intrahepatic recurrence is common; therefore, the prognosis of HCC

remains poor even with aggressive therapies, where the 5-year survival rate is as low as 25%-39% [6]. To improve outcomes, there is an urgent need to identify novel and efficient new targets for early diagnosis and effective treatment of HCC [7].

Hepatocarcinogenesis is a complex multistep process that involves activating oncogenes and inactivating tumor suppressor genes, in which many signaling cascades are altered and lead to a heterogeneous molecular profile [8-10]. Genetic factors, such as loss of heterozygosity, microsatellites, chromosome instability, and hypermethylation, have been reported in association with HCC [11]. Investigating and clarifying the roles of the genes involved in HCC development will contribute to our understanding of the mechanisms of hepatocarcinogenesis [7]. It is also significant for improving HCC diagnosis and treatment as well as predicting prognosis.

The tumor protein D52 (*TPD52*) gene was identified about 20 years ago. It is located at chromosome 8q21, at a region that is frequently gained or amplified in multiple human cancers [12-14]. Besides *TPD52*, this mammalian gene family contains three other genes: *TPD52L1*, *TPD52L2*, and *TPD52L3* [15]. Human *TPD52* isoforms are 200 amino acid residues in length and contain a number of sequence motifs, such as a coiled-coil motif, and N- and C-terminal-located proline, glutamic acid, serine, and threonine (PEST) sequences [12]. Numerous studies have revealed that *TPD52* is involved in regulating cell survival, proliferation, migration, and invasion, DNA repair, exocytosis, and vesicle trafficking [16-22]. However, its roles in cancer are controversial. *TPD52* is overexpressed in several cancers, such as ovarian, breast, prostate, and pancreatic cancer, and multiple myeloma, Burkitt's lymphoma, and melanoma [23-29]. *TPD52* is

also down-regulated in certain tumors, such as papillary renal cell cancer, leiomyosarcoma, clear cell renal cell cancer, liposarcoma, and lung cancer [30]. Although *TPD52* has been investigated in several cancers, to our knowledge, there are no reports on its expression and prognostic value in HCC.

In this study, we investigated the expression of *TPD52* in primary HCC using real-time quantitative reverse transcription-PCR, western blotting, and immunohistochemistry. Additionally, we evaluated the relationship between *TPD52* expression and the clinicopathological features of HCC, and investigated the prognostic value of *TPD52* in HCC. The mechanism of *TPD52* in hepatocarcinogenesis was also investigated.

## RESULTS

### *TPD52* mRNA and protein expression in primary HCC tissue samples and HCC cell lines

For the detection of *TPD52* mRNA expression, 1 µg of total RNA were needed to perform the reverse transcription. For the detection of *TPD52* protein expression, about 27 µg of protein were needed. However, in the 40 paired samples collected from HCC patients, some samples (cancerous tissues, or adjacent noncancerous tissues) were very small, and the RNA and protein may be degrading during the storage. Some samples were not enough to extract sufficient RNA and protein. So we chose 33 paired and 25 paired samples from the 40 paired samples to perform real-time PCR and western-blot analysis, respectively.

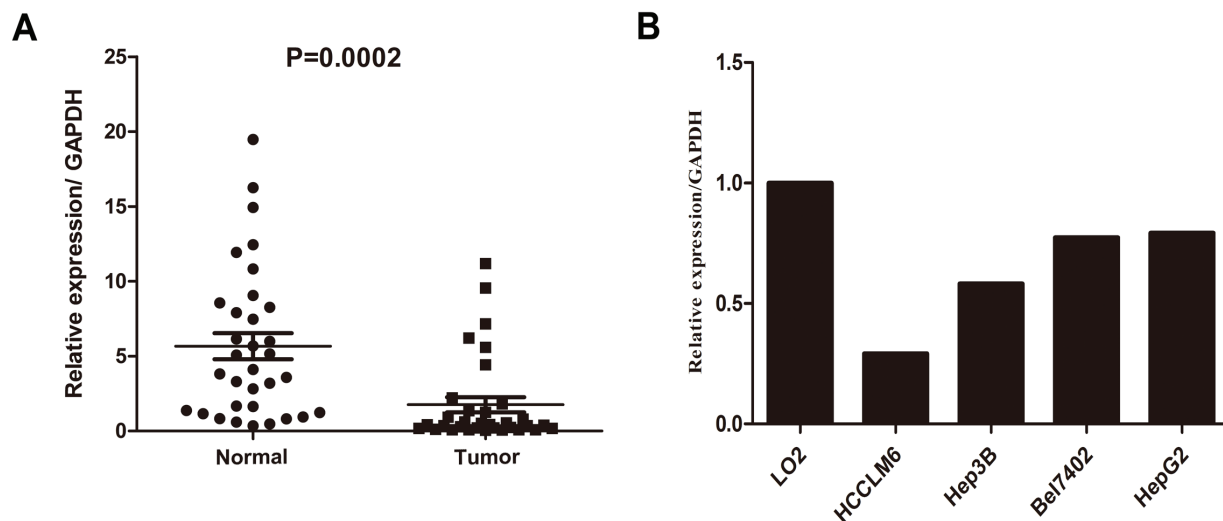

**Figure 1: Real-time quantitative PCR evaluation of *TPD52* mRNA expression in primary HCC surgical specimens and HCC cell lines.** A. The relative *TPD52* mRNA expression was significantly lower in 33 tumor tissues than in the matched adjacent non-tumor tissues ( $P = 0.0002$ ). B. Compared with the normal liver cell line LO2, *TPD52* mRNA expression was down-regulated in the HCCLM6, Hep3B, Bel7402, and HepG2 HCC cells.

Real-time quantitative PCR was performed on 33 paired clinical samples from patients with HCC (tumor tissues and matched adjacent non-tumor liver tissues) and HCC cell lines to determine their *TPD52* mRNA levels. *TPD52* mRNA expression was significantly down-regulated in 28/33 (85%) tumor tissues as compared with the matched adjacent non-tumor tissues ( $P = 0.0002$ , Figure 1A). Furthermore, *TPD52* transcript levels were decreased in the HepG2, Hep3B, HCCLM6, and Bel7402 HCC cell lines relative to the LO2 normal liver cell line (Figure 1B).

*TPD52* protein level was also detected on 25 paired fresh HCC tissues and matched control tissues, and HCC cell lines by western blotting analysis. Consistent with the real-time quantitative PCR results, *TPD52* protein expression was decreased in 17/25 (68%) tumor tissues ( $P = 0.039$ , Figure 2A and 2B). Likewise, compared to the LO2 cells, *TPD52* protein expression was decreased in the HCC cells, especially in the Hep3B and HepG2 cells (Figure 2D and 2E).

### Immunohistochemical analysis of *TPD52* expression in HCC clinical samples and its relationship to clinicopathological parameters

*TPD52* expression was investigated in 154 HCC surgical specimens using immunohistochemical staining.

*TPD52* was detected in the cytoplasm of the positive-stained cells (Figure 3). 68 cases (44.1%) had high *TPD52* expression (*TPD52*+++ or *TPD52*++); the remaining 86 cases (55.9%) had low *TPD52* expression (*TPD52*+ or *TPD52*-) (Table 1). Table 1 lists the relationship between *TPD52* expression and the clinicopathological parameters. The correlation analysis suggested that *TPD52* expression was significantly correlated with tumor-nodes- metastasis (TNM) stage ( $P = 0.011$ ).

### Relationship between *TPD52* expression and survival

The prognostic value of *TPD52* for survival was evaluated by comparing high and low *TPD52* expression in the patients with HCC. The median OS and DFS for patients with high *TPD52* expression were 51 and 26 months compared with 38 and 11 months for patients with low *TPD52* expression, respectively. The OS rates at 1-, 3-, and 5-years were 95.6%, 77.5%, and 63.7% for patients with high *TPD52* expression compared to 83.7%, 58%, and 44% for patients with low *TPD52* expression (log-rank test,  $P = 0.007$ ). The DFS rates at 1-, 3-, and 5-years were 68.7%, 56.7%, and 51.7%, for patients with high *TPD52* expression compared to 51.1%, 38.5%, and 25% for patients with low *TPD52* expression (log-rank test,  $P = 0.019$ ) (Figure 4). These results indicated that

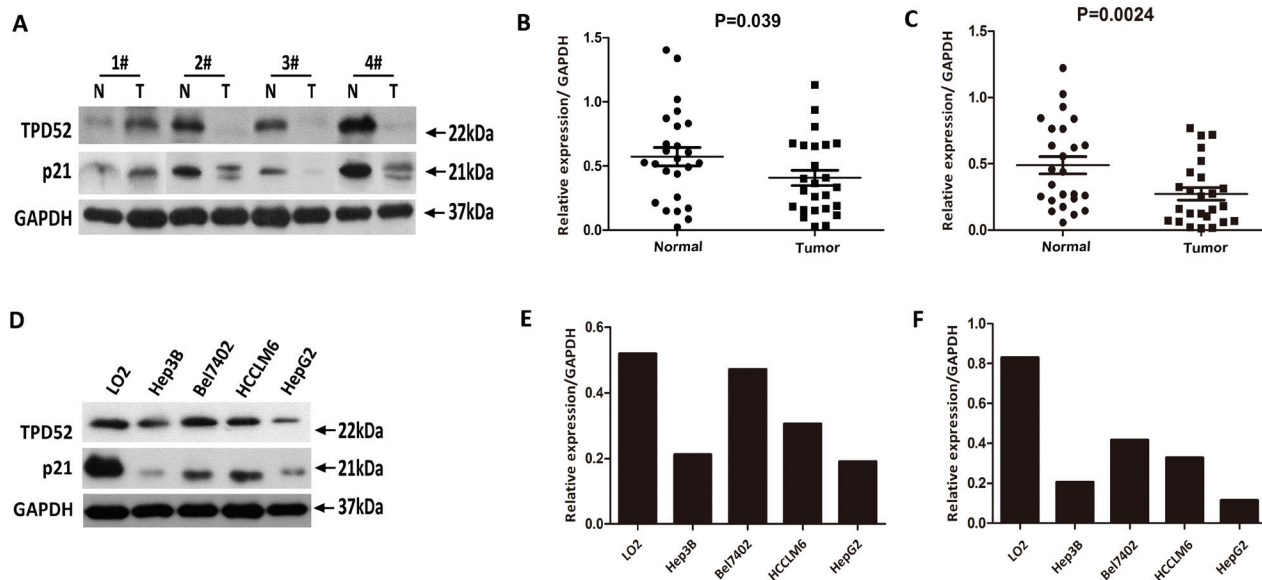

**Figure 2: Western blotting evaluation of *TPD52* and *p21* protein expression in primary HCC surgical specimens and HCC cell lines.** A. Representative result of expression of *TPD52* and *p21* protein in the same four pairs HCC tissues and matched adjacent non-cancerous tissues (N, matched non-cancerous tissues; T, HCC tissues). B. Relative expression of *TPD52* protein was lower in tumor tissues than in the matched adjacent non-tumor tissues ( $P = 0.039$ ,  $n = 25$ ). C. Relative expression of *p21* protein was lower in tumor tissues than in the matched adjacent non-tumor tissues ( $P = 0.0024$ ,  $n = 25$ ). D. Result of expression of *TPD52* and *p21* protein in the same HCC cell lines and the normal LO2 liver cell line. E. *TPD52* protein level was significantly lower in the Bel7402, HCCLM6, Hep3B, and HepG2 cells than in LO2 cell. F. *p21* protein level was also significantly lower in the Bel7402, HCCLM6, Hep3B, and HepG2 cells than in LO2 cell.



low TPD52 expression was significantly associated with poor prognosis in HCC.

Univariate and multivariate analyses were carried out to examine the effect of TPD52 expression on HCC prognosis using a Cox proportional hazard model. TPD52 expression showed a significant correlation with improved OS and DFS of patients in univariate analysis (Table 2 and Table 3). Multivariate Cox regression analysis further indicated that TPD52 expression was an independent predictor of OS and DFS (Table 2 and Table 3). Accordingly, TPD52 expression may be useful for predicting survival in HCC.

### Correlation of TPD52 expression with p21 or apoptosis-related protein in HCC

To understand the mechanisms linking TPD52 expression to hepatocarcinogenesis, we focused our further studies on the association between TPD52 and p21 to investigate whether TPD52 is involved in the regulation of p21 pathway in HCC. Firstly, p21 protein level was detected in the same fresh tissues samples as was used to examine TPD52. Decreased p21 expression was also seen in most tumor tissues ( $P = 0.0024$ , Figure 2C), and low expression of p21 was found in the samples which low express TPD52 (Figure 2A). Moreover, corresponding with TPD52 expression, the expression of p21 was down-

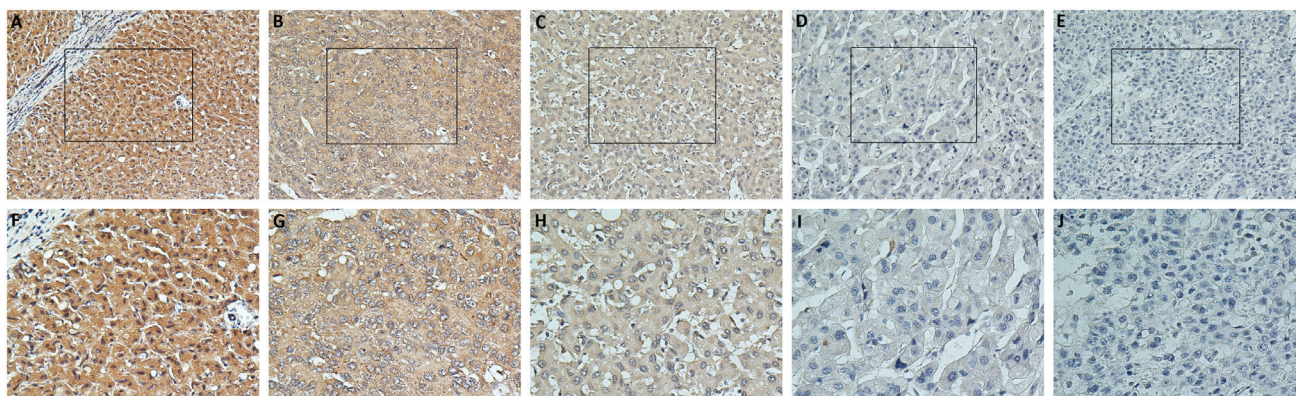

**Figure 3: Immunohistochemical analysis of TPD52 protein expression in primary HCC surgical specimens.** A. and F. Strongly stained normal liver tissue distant from the tumor. B. and G. Well-stained tumor tissues (TPD52+++). C. and H. Moderately stained tumor tissues (TPD52++). D. and I. Weakly stained tumor tissues (TPD52+). E. and J. Negatively stained tumor tissues (TPD52-). (A-E,  $\times 200$  magnification; F-J,  $\times 400$  magnification).

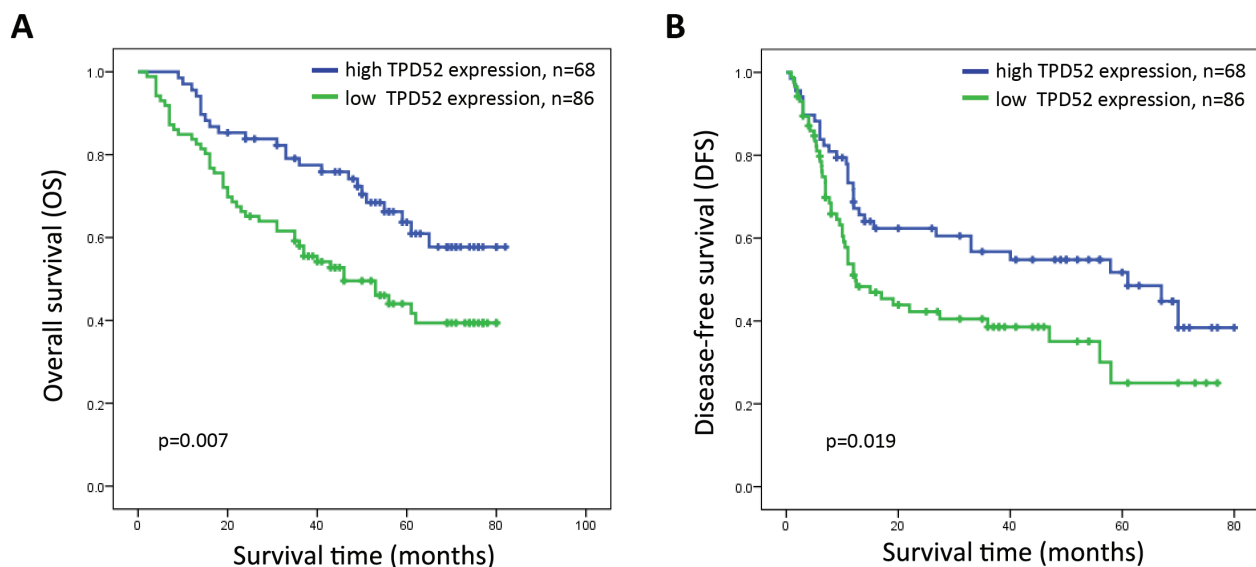

**Figure 4: Kaplan-Meier survival curves of patients with primary HCC after surgical resection according to the expression of TPD52.** A. The overall survival rate of patients in the low-TPD52 group was significantly lower than that of patients in the high-TPD52 group ( $P = 0.007$ ). B. The disease-free survival rate of patients in the low-TPD52 group was also significantly lower than that of patients in the high-TPD52 group ( $p = 0.019$ ).

regulated in HCC cell lines and was also predominantly decreased in the Hep3B and HepG2 cells (Figure 2D and 2F).

In addition, immunohistochemical analysis suggested that p21 expression was positively correlated with TPD52 expression (Figure 5A). All of the 154 patients with HCC were classified into four groups. The TPD52<sup>high</sup>p21<sup>high</sup> patients were found to exhibit the better overall survival and disease-free survival ( $p = 0.012$  and  $p = 0.013$ , respectively, Figure 5B and 5C). These results indicated that there is a significantly positive correlation between TPD52 and p21, and high TPD52 expression may improve survival of HCC patients through involving in p21 pathway.

To further evaluate the molecular mechanism of TPD52 in p21 pathway and the association of TPD52 with apoptotic-related protein in HCC, we generated TPD52-overexpressing cells of which the levels of TPD52

expression were confirmed by western blotting (Figure 6A). The protein levels of p21 and p53 were increased when TPD52 was overexpressed in HCC cells, while MDM2, P-GSK-3 $\beta$  and BCL2 expression were measured strongly decrease in TPD52-overexpressing cells (Figure 6A). Furthermore, we also generated TPD52-knockdown cells. Expectably, TPD52 knockdown was associated with significant down-regulation of p21 and p53 expression and with evident up-regulation of MDM2, P-GSK-3 $\beta$  and BCL2 expression (Figure 6B). However, BAX and Akt were found no significant change in TPD52-knockdown cells or TPD52-overexpressing cells (Figure 6A and 6B).

## DISCUSSION

Currently, a collection of studies on the role of TPD52 in cancers is underway. In our study, we used a relatively large series of clinical tissue samples and cell

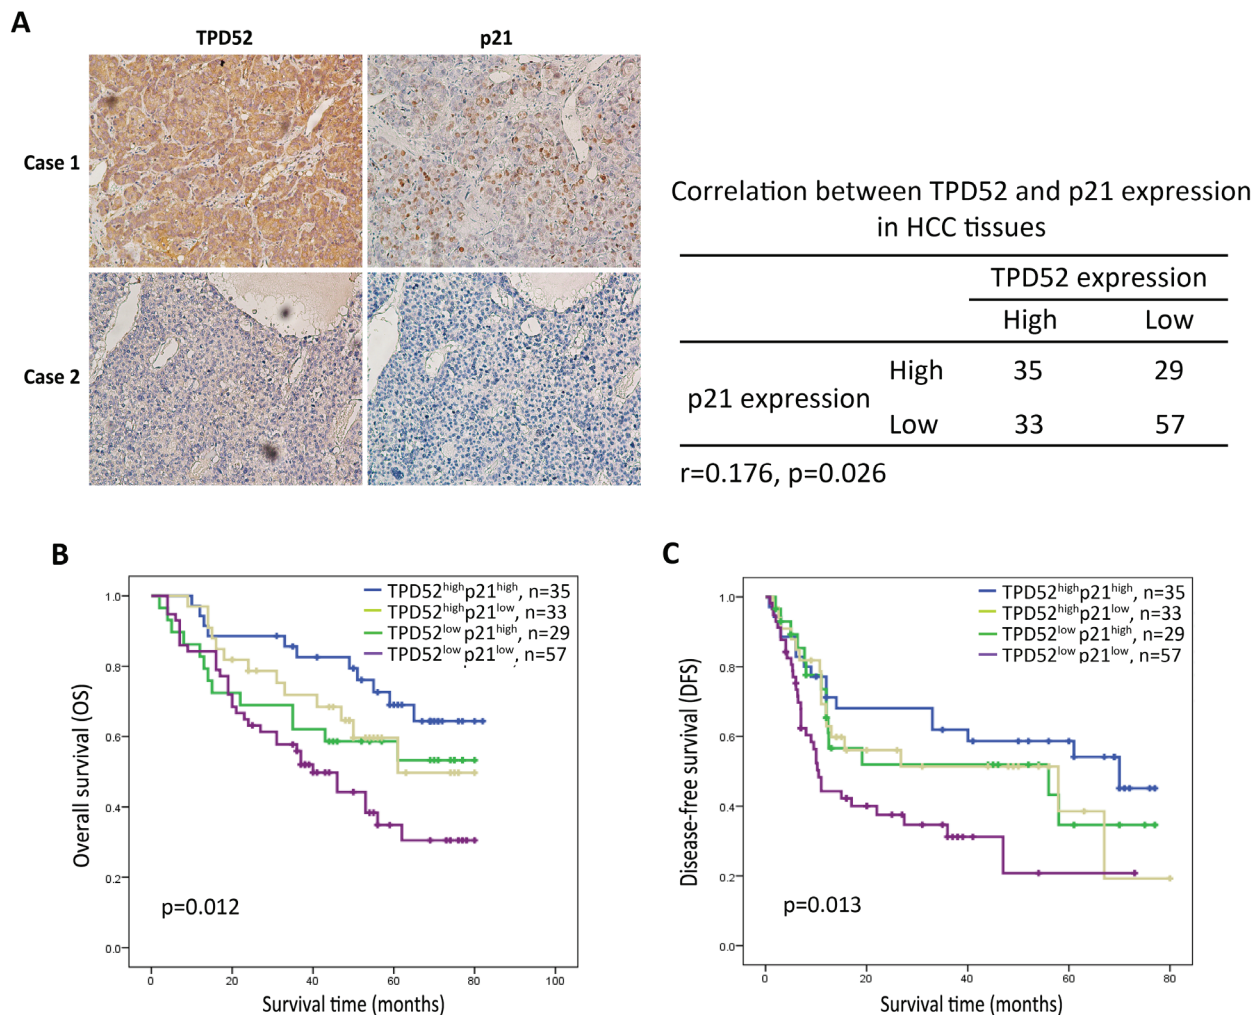

**Figure 5: Immunohistochemical analysis for the correlation between TPD52 and p21 protein expression. A.** Immunohistochemical staining of TPD52 or p21 was performed in the serial sections from the same tumor tissues. A summary of the results was shown that there is significant positive correlation between TPD52 and p21 expression in HCC tissues ( $p = 0.026$ ). **B.** and **C.** High expression of both TPD52 and p21 indicated better overall survival and disease-free survival of patients with HCC. (A,  $\times 200$  magnification).



lines to assess TPD52 expression and its prognostic value in HCC. We measured TPD52 mRNA and protein expression in paired primary HCC tissue samples and HCC cell lines using real-time quantitative PCR and western blotting, respectively. We found that TPD52 expression was down-regulated at both transcriptional and translational level in most primary HCC tumor tissues and HCC cell lines, which was consistent with findings of Tennstedt et al [30]. Immunohistochemical analysis also revealed decreased TPD52 expression in most HCC tumor tissues as compared with the corresponding non-tumor tissues. Correlation analysis showed that decreased TPD52 expression in HCC was significantly associated with TNM stage, suggesting that decreased TPD52 expression may facilitate tumor invasion and infiltration. Kaplan-Meier survival analysis revealed that high TPD52 expression was significantly correlated with favorable prognosis. In addition, multivariate analysis determined that TPD52 expression was an independent prognostic factor for overall survival and disease-free survival. These results suggest that TPD52 might serve as a postoperative prognostic marker for patients with HCC. Corresponding with our study, a recent microarray analysis identified TPD52 over-expression as being associated with improved progression-free survival and overall survival in patients with serous and endometrioid tumors [31]. Another research also found that increased TPD52 expression might be a favorable prognostic marker in ovarian carcinoma [32].

It is generally known that p21 is considered as a potential tumour suppressor via a crucial regulation

of cell cycle and senescence in various cancers [33, 34]. Various genetic studies confirmed the ability of p21 to delay tumor development in HCC [35, 36]. In the present study, we found that there is a significantly positive correlation between TPD52 and p21 expression, indicating TPD52 may suppress HCC tumorigenicity and progression through involving in p21 pathway to regulate cell growth and apoptotic. Our further research of apoptotic-related protein showed that p53 expression was also significantly up-regulated or down-regulated in TPD52-overexpressing cells or TPD52-knockdown cells. The tumor suppressor p53 is one of the most important cellular gatekeepers for cell cycle arrest, cellular senescence, apoptosis and DNA repair by regulating p21 and other apoptosis-related proteins [37, 38]. The change of P53 affected by TPD52 suggested that TPD52 may play a significant role in cell survival by regulating p53 in p21 pathway. In addition, we found that MDM2, P-GSK-3 $\beta$  and BCL2 were markedly down-regulated in TPD52-overexpressing cells and up-regulated in TPD52-knockdown cells, implying TPD52 might negatively regulate these promoting tumorigenesis factors. Recently, MDM2 was known as the major negative regulator of p53 with multiple inhibitory mechanisms such as preventing the transcriptional coactivator recruitment, inhibiting p53-DNA interaction or p53 indirect translation [39, 40]. Zhang et al. [41] reported that MDM2 can independently reduce p21 stability via proteasome-mediated degradation. Studies on GSK-3 showed that P-GSK-3 $\beta$  (serine 9) is a point of convergence for numerous cell signaling pathways involved in cellular physiological processes,

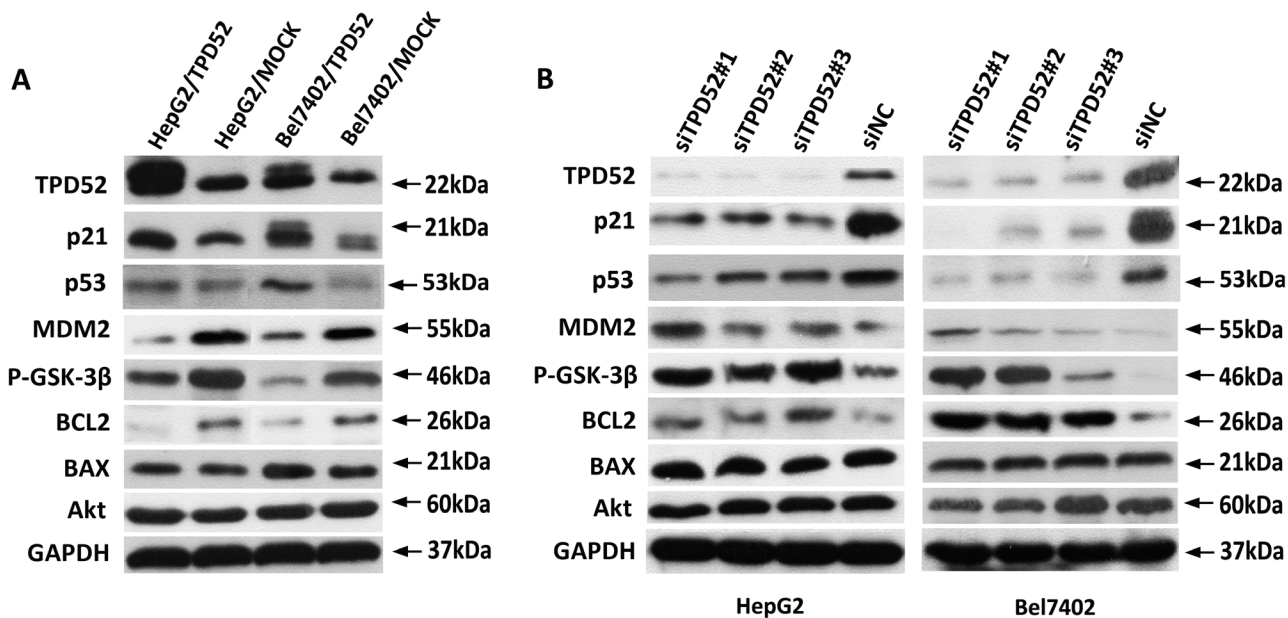

**Figure 6: Western blotting detection of apoptosis-related protein.** A. Up-regulation of p21 and p53 were detected in TPD52-overexpressed HepG2 and Bel7402 cells. But the expression of MDM2, P-GSK-3 $\beta$  and BCL2 were decreased in TPD52-overexpressed HepG2 and Bel7402 cells. B. Down-regulation of p21 and p53 were detected in TPD52-knockdown HepG2 and Bel7402 cells. However, the expression of MDM2, P-GSK-3 $\beta$  and BCL2 were increased in TPD52-knockdown HepG2 and Bel7402 cells.

**Table 1: Relationship between TPD52 expression and clinicopathological features of patients with HCC (n = 154)**

| Clinicopathologic variables    | Number | TPD52 expression |      | P value |
|--------------------------------|--------|------------------|------|---------|
|                                |        | low              | high |         |
| All cases                      | 154    | 86               | 68   |         |
| Age (years)                    |        |                  |      | 0.623   |
| <50                            | 89     | 51               | 38   |         |
| ≥50                            | 65     | 35               | 30   |         |
| Gender                         |        |                  |      | 0.842   |
| Male                           | 123    | 70               | 53   |         |
| Female                         | 31     | 16               | 15   |         |
| HBV                            |        |                  |      | 0.325   |
| Negative                       | 21     | 14               | 7    |         |
| Positive                       | 133    | 72               | 61   |         |
| Tumor size(cm)                 |        |                  |      | 0.745   |
| <5                             | 77     | 42               | 35   |         |
| ≥5                             | 77     | 44               | 33   |         |
| Tumor number                   |        |                  |      | 0.838   |
| Single                         | 124    | 70               | 54   |         |
| Mutiple                        | 30     | 16               | 14   |         |
| Liver cirrhosis                |        |                  |      | 1.000   |
| No                             | 33     | 19               | 14   |         |
| Yes                            | 121    | 67               | 54   |         |
| Tumor encapsulation            |        |                  |      | 0.662   |
| None                           | 58     | 33               | 25   |         |
| Complete                       | 53     | 31               | 22   |         |
| Incomplete                     | 43     | 22               | 21   |         |
| Serum AFP                      |        |                  |      | 0.245   |
| <400                           | 95     | 49               | 46   |         |
| ≥400                           | 59     | 37               | 22   |         |
| Histilological differentiation |        |                  |      | 0.178   |
| Well                           | 52     | 26               | 26   |         |
| Moderate                       | 66     | 35               | 31   |         |
| Poor                           | 36     | 25               | 11   |         |
| TNM stage                      |        |                  |      | 0.011*  |
| I-II                           | 100    | 48               | 52   |         |
| III                            | 54     | 38               | 16   |         |

AFP, alpha-fetoprotein.

\*Statistically significant ( $P < 0.05$ ).

such as cell cycle, differentiation and apoptosis [42, 43]. Recent work demonstrated that GSK-3 $\beta$  is involved in the process of tumorigenesis by participating in the NF- $\kappa$ B-mediated gene transcription, which predicts that GSK-3 $\beta$  would promote cancer cell proliferation [44, 45]. BCL2 is well known as an inhibitor of apoptosis which play an important role in hepatocarcinogenesis [46]. A recent study suggested phosphor-inactivation of GSK-3 $\beta$  (P-GSK-3 $\beta$ ) boost the production of BCL2 by enhancing the activity of CREB-ATF-1 in the context of PI3K/Akt

activation [47]. Ummanni et al.[48] demonstrated that exogenous TPD52 expression promotes prostate cancer cell migration via  $\alpha$ v $\beta$ 3 integrin by activating the protein kinase B/Akt signaling pathway. However, based on our research, we make our point that TPD52 may restrain HCC tumorigenesis and development via up-regulating the expression of p21 and p53, and down-regulating the expression of tumor promoter including MDM2, P-GSK-3 $\beta$  and BCL2 in the context of PI3K/Akt signaling.

In conclusion, our results confirmed that TPD52 is

**Table 2: Univariate and multivariate analysis of overall survival in HCC**

| Variables                    | Univariate analysis |             |         | Multivariate analysis |             |         |
|------------------------------|---------------------|-------------|---------|-----------------------|-------------|---------|
|                              | HR                  | 95% CI      | p value | HR                    | 95% CI      | P value |
| Age                          | 0.780               | 0.507-1.201 | 0.259   |                       |             |         |
| Gender                       | 1.050               | 0.625-1.764 | 0.853   |                       |             |         |
| HBV                          | 1.250               | 0.646-2.417 | 0.508   |                       |             |         |
| Tumor size                   | 1.527               | 1.003-2.324 | 0.048*  | 1.340                 | 0.873-2.058 | 0.181   |
| Tumor number                 | 1.731               | 1.067-2.811 | 0.026*  | 1.627                 | 0.997-2.654 | 0.051   |
| Tumor encapsulation          | 1.161               | 0.888-1.517 | 0.276   |                       |             |         |
| TNM stage                    | 2.210               | 1.446-3.678 | <0.001* | 1.708                 | 1.085-2.689 | 0.021*  |
| Liver cirrhosis              | 1.080               | 0.642-1.817 | 0.771   |                       |             |         |
| Histological differentiation | 0.964               | 0.727-1.278 | 0.800   |                       |             |         |
| AFP                          | 1.162               | 0.758-1.781 | 0.491   |                       |             |         |
| TPD52                        | 0.488               | 0.312-0.764 | 0.002*  | 0.571                 | 0.357-0.911 | 0.019*  |

HR, hazard ratio; CI, confidence interval; AFP, alpha-fetoprotein.

\*Statistically significant ( $P < 0.05$ ).

**Table 3: Univariate and multivariate analysis of disease-free survival in HCC**

| Variables                    | Univariate analysis |             |         | Multivariate analysis |             |         |
|------------------------------|---------------------|-------------|---------|-----------------------|-------------|---------|
|                              | HR                  | 95% CI      | p value | HR                    | 95% CI      | P value |
| Age                          | 1.338               | 0.866-2.066 | 0.190   |                       |             |         |
| Gender                       | 1.0.40              | 0.602-1.794 | 0.889   |                       |             |         |
| HBV                          | 1.559               | 0.751-3.237 | 0.233   |                       |             |         |
| Tumor size                   | 1.137               | 0.735-1.759 | 0.564   |                       |             |         |
| Tumor number                 | 1.590               | 0.941-2.687 | 0.083   |                       |             |         |
| Tumor encapsulation          | 1.164               | 0.879-1.541 | 0.290   |                       |             |         |
| TNM stage                    | 1.356               | 0.972-1.356 | 0.073   |                       |             |         |
| Liver cirrhosis              | 0.901               | 0.528-1.536 | 0.701   |                       |             |         |
| Histological differentiation | 1.008               | 0.756-1.345 | 0.956   |                       |             |         |
| AFP                          | 1.000               | 1.000-1.000 | 0.001*  | 1.000                 | 1.000-1.000 | 0.001*  |
| TPD52                        | 0.593               | 0.379-0.925 | 0.021*  | 0.586                 | 0.375-0.916 | 0.019*  |

HR, hazard ratio; CI, confidence interval; AFP, alpha-fetoprotein.

\*Statistically significant ( $P < 0.05$ ).

down-regulated in HCC tissues at both mRNA and protein levels and that low TPD52 expression correlates with poor prognosis in HCC. TPD52 may suppress HCC initiation and development by up-regulating the expression of p21 and p53, and down-regulating the expression of tumor promoter MDM2, P-GSK-3 $\beta$  and BCL2. Our findings suggested that TPD52 may serve as a novel prognostic marker and therapeutic target in HCC, although further research is required to clarify the molecular mechanism of TPD52 in HCC initiation and progression.

## MATERIALS AND METHODS

### Patients and tumor tissue samples

A total of 154 paraffin-embedded samples were collected from HCC patients undergoing hepatectomy at the Sun Yat-sen University Cancer Center (SYSUCC) between 2001 and 2009. All of the patients mentioned above had no received preoperative chemotherapy or radiotherapy. Histological types were assigned according to World Health Organization (WHO) classification criteria. The clinical stage was verified according to the 7th TNM staging system which was updated by The American



Joint Committee on Cancer (AJCC)/ International Union Against Cancer (UICC) in 2010 [49]. Another 40 fresh tumor tissues and matched control tissues were obtained from HCC patients who had undergone surgical resection at SYSUCC between 2011 and 2013. Both the cancerous and corresponding noncancerous tissues >2 cm away from the HCC were sampled; the diagnosis was confirmed by pathological examination. The matched fresh tissues were obtained following surgical resection and immediately immersed in RNAlater (Thermo Fisher Scientific, Waltham, MA, USA) to stop RNA degradation, kept at 4°C overnight to ensure thorough penetration of the tissues, then frozen at -80°C until RNA and protein isolation were performed. The investigation was conducted in accordance with the ethical standards and was approved by the SYSUCC Ethics Committee.

### RNA extraction and real-time quantitative PCR

Total RNA was extracted from the 40 pairs fresh tissues using TRIzol (Invitrogen, Carlsbad, CA, USA) according to the manufacturer's protocol. The total RNA concentration and quantity were assessed by absorbance at 260 nm using a NanoDrop spectrophotometer (ND-1000; Thermo Fisher Scientific). First-strand complementary DNA (cDNA) synthesis was performed using 1 µg total RNA and M-MLV reverse transcriptase according to the manufacturer's protocol (Promega, Beijing, China). The cDNA was subjected to real-time PCR to evaluate the relative expression levels of *TPD52* and the reference gene glyceraldehyde-3-phosphate dehydrogenase (*GAPDH*). The following primer sequences were used: *TPD52* forward, 5'-GAGGAAGGAGAAGATGTTGC-3'; *TPD52* reverse, 5'-GCCGAATTCAAGACTTCTCC-3'; *GAPDH* forward, 5'-CTCCTCCTGTTTCGACAGTCAGC-3'; *GAPDH* reverse, 5'-CCCAATACGACCAAATCCGTT-3'. Each 20-µL reaction volume contained 2 µL cDNA, 0.4 µL each pair of oligonucleotide primer, 7.2 µL nuclease-free water, and 10 µL 2× SYBR Green Master Mix (Promega). The cycling parameters began with 50°C for 2 minutes and 95°C for 2 minutes, and then 40 cycles of amplification at 95°C for 15 seconds, 60°C for 30 seconds, and 72°C for 20 seconds, followed by melting curve analysis. The threshold cycle value (Ct) was measured during the exponential amplification phase, and the amplification plots were analyzed using SDS 2.3 software. The relative expression levels of the target gene *TPD52* were normalized to that of the internal control gene *GAPDH*. The data were analyzed using the comparative threshold cycle ( $2^{-\Delta\Delta Ct}$ ) method.

### Protein extraction, western blotting, and analysis

Freshly frozen tissue specimens that also from the 40 pairs fresh tissues, cultured cells (LO2,

HepG2, Hep3B, HCCLM6, Bel7402), were lysed in radioimmunoprecipitation assay lysis buffer, and the lysates were cleared by centrifugation (12000 rpm) at 4°C for 30 minutes. Approximately 27 µg protein was run on a 15% sodium dodecyl sulfate-polyacrylamide gel and transferred to a polyvinylidene fluoride membrane. After blocking nonspecific binding sites for 60 minutes with 5% non-fat milk, the membranes were incubated with rabbit monoclonal antibodies against TPD52 (1:1000; Abcam, Cambridge, MA, USA), p21, p53, Akt, P-GSK-3β (serine 9) (1:1000; Cell Signaling Technology, Inc, USA), MDM2, BAX, BCL2 (1:500, Proteintech, Chicago, IL, USA), rabbit monoclonal anti-human antibodies against GAPDH (1:10000; Proteintech, Chicago, IL, USA) overnight at 4°C. Next, the membranes washed three times with Tris-buffered saline with Tween-20 (TBST) for 15 minutes and then incubated with horseradish peroxidase (HRP)-conjugated goat anti-rabbit immunoglobulin G antibody (1:1500; Cell Signaling Technology, Danvers, MA, USA) for 1 hour at room temperature. The membrane was then washed three times with TBST and was developed using an enhanced chemiluminescence system (Cell Signaling Technology). The band intensity was measured by densitometry using Quantity One software (Bio-Rad Laboratories, Hercules, CA, USA).

### Immunohistochemistry

A total of 154 paraffin-embedded tissue blocks were sectioned for immunohistochemistry. The sections were deparaffinized with dimethylbenzene and rehydrated with graded 100%, 95%, 90%, 80%, and 70% ethanol. After three washes in phosphate-buffered saline (PBS) for 3 minutes, the slides were immersed in EDTA (1 mmol/L, pH 8.0) and boiled for 15 minutes in a microwave oven for antigen retrieval. After three rinses in PBS for 3 minutes, 3% hydrogen peroxide was used to block the endogenous peroxidase for 10 minutes at room temperature, and the slides were incubated with primary antibody against TPD52 (1:400; Bioss, Beijing, China) or p21 (1:200; Cell Signaling Technology, Inc, USA) at 4°C overnight in a humidified chamber. After five washes in PBS for 5 minutes, the sections were incubated with HRP-conjugated secondary antibody (Envision™ Detection Kit, GK500705; Gene Tech, Shanghai, China) at room temperature for 30 minutes, and then washed five more times with PBS for 5 minutes. The visualization signal was developed with 3,3'-diaminobenzidine tetrahydrochloride, and the sections were counterstained with 20% hematoxylin. Finally, the slides were dehydrated, cleared, and evaluated. Negative control sections were processed as described above except they were incubated overnight at 4°C in blocking solution without the primary antibody.

The total TPD52 immunostaining score was calculated from the percentage of positively stained tumor cells and the staining intensity. The percent

positivity was scored as 0 (<5%, negative), 1 (5%-25%, sporadic), 2 (25%-50%, focal), or 3 (>50%, diffuse). Staining intensity was scored as 0 (no staining), 1 (weak staining), 2 (moderate staining), or 3 (strong staining). The sum score of the immunostaining was calculated as the percentage positive score × staining intensity score, and ranged from 0 to 9. We defined TPD52 expression levels as follows: - (0-1 points), + (2-3 points), ++ (4-6 points), or +++ (>6 points). The sampled patients were divided into low TPD52 expression (TPD52- or TPD52+) or high TPD52 expression groups (TPD52++ or TPD52+++). The p21 immunostaining score was calculated as p21 index (the number of p21 positive cells per 1000 cells counted) and the IHC score was 0 (p21 index <5, no staining), 1 (p21 index 5-50, weak staining), 2 (p21 index 50-100, moderate staining), or 3 (p21 index >100, strong staining). We divided the sample patients into two groups: low p21 expression (0-1 points) or high p21 expression (2-3 points). All immunostained sections were analyzed by two observers who were blinded to the patients' clinical outcome. There was inter-observer discrepancy in less than 10% of the examined slides, and consensus was reached after further review.

### Cell lines and culture conditions

We obtained the LO2, Bel7402, and HCCLM6 cell lines from the Committee of Type Culture Collection of the Chinese Academy of Sciences (Shanghai, China), and cultured them in RPMI 1640 medium supplemented with 10% heat-inactivated fetal bovine serum (FBS) and 1% penicillin-streptomycin. The HepG2 and Hep3B cell lines obtained from American Type Culture Collection (Manassas, VA, USA) were cultured in Dulbecco's modified Eagle's medium supplemented with 10% heat-inactivated FBS and 1% penicillin-streptomycin. All cells were incubated in a 37°C humidified incubator containing 5% CO<sub>2</sub>.

### RNA oligonucleotides and cell transfections

TPD52 overexpression plasmid (EX-Z3578-M02) and the control clone (EX-EGFP-M02) were obtained from GeneCopoeia (USA). The HepG2 and Bel7402 cells were transfected with the indicated TPD52 plasmid construct using Lipofectamine 2000 according to the manufacturer's instruction.

The small interfering RNAs (siRNAs) for TPD52 knockdown were synthesized by GenePharma (Suzhou, China). The three siRNA sequences were as follows: siTPD52-1#, sense=5'-CCCUGAGGAAGGAGAAGAUUTT-3' and antisense=5'-AUCUUCUCCUCCUCAGGGTT-3'; siTPD52-2#, sense=5'-GGAAGAGCUAAGAAGAGAATT-3' and antisense=5'-

UUCUCUUCUUAGCUCUUCCTT-3'; siTPD52-3#, sense=5'-GCGGAAACUUGGAAUCAAUTT-3' and antisense=5'-AUUGAUUCCAAGUUUCCGCTT-3'.

The negative control (NC), sense=5'-UUCUCCGAACGUGUCACGUTT-3' and antisense=5'-ACGUGACACGUUCGGAGAATT-3'. The HepG2 and Bel7402 cells were selected to be transfected with 20 μM siTPD52 or NC for 72 hours using the Lipofectamine RNAi MAX reagent (Invitrogen, USA) according to the manufacturer's protocol.

Both the transfection efficiency were evaluated by western blotting.

### Patient follow-up

Postoperative follow-up was conducted regularly at the outpatient department or follow-up center of Sun Yat-sen University Cancer Center, and included clinical and laboratory examination every 3 months for the first 2 years, every 6 months in the following 3 years, and annually for an additional 5 years or until death, whichever occurred first. Overall survival (OS) and disease-free survival (DFS) were used as a measure of prognosis. OS was defined as the time from surgery to death or the last follow-up. DFS was calculated from the date of surgery to the date of progression, recurrence, death or final follow-up. All follow-up data in this research are available and complete.

### Statistical analysis

Statistical analyses were performed using the Statistical Package for the Social Sciences, version 20.0 (SPSS Inc., Chicago, IL, USA). A paired-samples *t*-test was used to compare TPD52 mRNA and protein expression in HCC tumors with that of their paired adjacent non-tumor tissue samples. The correlation between tumor TPD52 or p21 expression and the clinical and pathological features were analyzed using a chi square test for proportion and Pearson's correlation coefficients. Overall survival curves were calculated using the Kaplan-Meier method and were analyzed with the log-rank test. Cox proportional hazards analysis was used in univariate and multivariate analysis to explore the effects of TPD52 expression and HCC clinicopathological variables on survival. The variables included in multivariate analysis were the one considered statistically significant in univariate analysis. The results were analyzed using the Student *t*-test and are expressed as the mean ± standard deviation. A two-sided P-value < 0.05 was considered statistically significant.

### ACKNOWLEDGMENTS

This work was primarily supported by a grant

from the National Natural Science Foundation of China (31270964) and the key project of Natural Science Foundation of Guangdong Province (S2013020012722), and was partially supported by Guangdong Province Science and Technology Plan Project (2012A030400059).

## CONFLICTS OF INTEREST

The authors declare that no competing interests exist.

## REFERENCES

- Centers for Disease Control and Prevention (CDC). Hepatocellular carcinoma -United States 2001-2006. *MMWR*. 2010; 59: 517-520.
- El-Serag HB. Hepatocellular carcinoma. *N Engl J Med*. 2011; 365: 1118-1127.
- Llovet JM, Bruix J. Novel advancements in the management of hepatocellular carcinoma in 2008. *J Hepatol*. 2008; 48: S20-S37.
- Forner A, Llovet JM, Bruix J. Hepatocellular Carcinoma. *Lancet*. 2012; 379: 1245-1255.
- Mlynarsky L, Menachem Y, Shibolet O. Treatment of hepatocellular carcinoma: Steps forward but still a long way to go. *World J Hepatol*. 2015; 7: 566-574.
- Ding Y, Chen B, Wang S, Zhao L, Chen J, Ding Y, Chen L, Luo R. Overexpression of Tiam1 in hepatocellular carcinomas predicts poor prognosis of HCC patients. *Int J Cancer*. 2009; 124: 653-658.
- Frau M, Biasi F, Feo F, Pascale RM. Prognostic markers and putative therapeutic targets for hepatocellular carcinoma. *Mol Aspects Med*. 2010; 31: 179-193.
- Farazi PA, Depinho RA. Hepatocellular carcinoma pathogenesis: from genes to environment. *Nature Reviews Cancer*. 2006; 6: 674-687.
- Villanueva A, Newell P, Chiang DY, Friedman SL, Llovet JM. Genomics and signaling pathways in hepatocellular carcinoma. *Semin Liver Dis*. 2007; 27: 55-76.
- Wang J, An H, Mayo MW, Baldwin AS, Yarbrough WG. LZAP, a putative tumor suppressor, selectively inhibits NF-kappaB. *Cancer Cell*. 2007; 12: 239-251.
- Mann DA. Epigenetics in liver disease. *Hepatology*. 2014; 60: 1418-1425.
- Byrne JA, Frost S, Chen Y, Bright RK. Tumor protein D52 (TPD52) and cancer-oncogene understudy or understudied oncogene? *Tumour Biol*. 2014; 35: 7369-7382.
- Cancer Genome Atlas Network. Comprehensive molecular portraits of human breast tumours. *Nature*. 2012; 490: 61-70.
- Choschzick M, Lassen P, Lebeau A, Marx AH, Terracciano L, Heilenkötter U, Jaenicke F, Bokemeyer C, Izbicki J, Sauter G, Simon R. Amplification of 8q21 in breast cancer is independent of MYC and associated with poor patient outcome. *Mod Pathol*. 2010; 23: 603-610.
- Boutros R, Fanayan S, Shehata M, Byrne JA. The tumor protein D52 family: many pieces, many puzzles. *Biochem Biophys Res Commun*. 2004; 325: 1115-1121.
- Shehata M, Bièche I, Boutros R, Weidenhofer J, Fanayan S, Spalding L, Zeps N, Byth K, Bright RK, Lidereau R, Byrne JA. Nonredundant functions for tumor protein D52-like proteins support specific targeting of TPD52. *Clin Cancer Res*. 2008; 14: 5050-5060.
- Roslan N, Bièche I, Bright RK, Lidereau R, Chen Y, Byrne JA. TPD52 represents a survival factor in ERBB2-amplified breast cancer cells. *Mol Carcinog*. 2014; 53: 807-819.
- Chen Y, Kamili A, Hardy JR, Groblewski GE, Khanna KK, Byrne JA. Tumor protein D52 represents a negative regulator of ATM protein levels. *Cell Cycle*. 2013; 12: 3083-3097.
- Adamson B, Smogorzewska A, Sigoillot FD, King RW, Elledge SJ. A genome-wide homologous recombination screen identifies the RNA-binding protein RBMX as a component of the DNA-damage response. *Nat Cell Biol*. 2012; 14: 318-328.
- Thomas DD, Martin CL, Weng N, Byrne JA, Groblewski GE. Tumor protein D52 expression and Ca<sup>2+</sup>-dependent phosphorylation modulates lysosomal membrane protein trafficking to the plasma membrane. *Am J Physiol Cell Physiol*. 2010; 298: 725-739.
- Chew CS, Chen X, Zhang H, Berg EA, Zhang H. Calcium/ calmodulin- dependent phosphorylation of tumor protein D52 on serine residue 136 may be mediated by CAMK2delta6. *Am J Physiol Gastrointest Liver Physiol*. 2008; 298: 1159-1172.
- Messenger SW, Thomas DD, Falkowski MA, Byrne JA, Gorelick FS, Groblewski GE. Tumor protein D52 controls trafficking of an apical endolysosomal secretory pathway in pancreatic acinar cells. *Am J Physiol Gastrointest Liver Physiol*. 2013; 305: 439-452.
- Byrne JA, Balleine RL, Schoenberg Fejzo M, Mercieca J, Chiew YE, Livnat Y, St Heaps L, Peters GB, Byth K, Karlan BY, Slamon DJ, Harnett P, Defazio A. Tumor protein D52 (TPD52) is overexpressed and a gene amplification target in ovarian cancer. *Int J Cancer*. 2005; 117: 1049-1054.
- Balleine RL, Fejzo MS, Sathasivam P, Basset P, Clarke CL, Byrne JA. The hD52 (TPD52) gene is a candidate target gene for events resulting in increased 8q21 copy number in human breast carcinoma. *Genes Chromosomes Cancer*. 2000; 29: 48-57.
- Kim JH, Dhanasekaran SM, Mehra R, Tomlins SA, Gu W, Yu J, Kumar-Sinha C, Cao X, Dash A, Wang L, Ghosh D, Shedden K, Montie JE, et al. Integrative analysis of genomic aberrations associated with prostate cancer progression. *Cancer Res*. 2007; 67: 8229-8239.
- Loukopoulou P, Shibata T, Katoh H, Kokubu A, Sakamoto M, Yamazaki K, Kosuge T, Kanai Y, Hosoda F, Imoto I,



- Ohki M, Inazawa J, Hirohashi S. Genome-wide array-based comparative genomic hybridization analysis of pancreatic adenocarcinoma: identification of genetic indicators that predict patient outcome. *Cancer Sci.* 2007; 98: 392-400.
27. Largo C, Alvarez S, Saez B, Blesa D, Martin-Subero JI, González-García I, Brieva JA, Dopazo J, Siebert R, Calasanz MJ, Cigudosa JC. Identification of overexpressed genes in frequently gained/amplified chromosome regions in multiple myeloma. *Haematologica.* 2006; 91: 184-191.
  28. Dave SS, Fu K, Wright GW, Lam LT, Klun P, Boerma EJ, Greiner TC, Weisenburger DD, Rosenwald A, Ott G, Müller-Hermelink HK, Gascoyne RD, Delabie J, et al. Molecular diagnosis of Burkitt's lymphoma. *N Engl J Med.* 2006; 354: 2431-2442.
  29. Roesch A, Becker B, Bentink S, Spang R, Vogl A, Hagen I, Landthaler M, Vogt T. Ataxia telangiectasia-mutated gene is a possible biomarker for discrimination of infiltrative deep penetrating nevi and metastatic vertical growth phase melanoma. *Cancer Epidemiol Biomarkers Prev.* 2007; 16: 2486-2490.
  30. Tennstedt P, Bölch C, Strobel G, Minner S, Burkhardt L, Grob T, Masser S, Sauter G, Schlomm T, Simon R. Patterns of TPD52 overexpression in multiple human solid tumor types analyzed by quantitative PCR. *Int J Oncol.* 2014; 44: 609-615.
  31. Tothill RW, Tinker AV, George J, Brown R, Fox SB, Lade S, Johnson DS, Trivett MK, Etemadmoghadam D, Locandro B, Traficante N, Fereday S, Hung JA, et al. Novel molecular subtypes of serous and endometrioid ovarian cancer linked to clinical outcome. *Clin Cancer Res.* 2008; 14: 5198-5208.
  32. Byrne JA, Maleki S, Hardy JR, Gloss BS, Murali R, Scurry JP, Fanayan S, Emmanuel C, Hacker NF, Sutherland RL, Defazio A, O'Brien PM. MAL2 and tumor protein D52 (TPD52) are frequently overexpressed in ovarian carcinoma, but differentially associated with histological subtype and patient outcome. *BMC Cancer.* 2010; 10: 497.
  33. Romanov VS, Pospelov VA, Pospelova TV. Cyclin-dependent kinase inhibitor p21(Waf1): contemporary view on its role in senescence and oncogenesis. *Biochemistry (Mosc).* 2012; 77: 575-584.
  34. Abbas T, Dutta A. p21 in cancer: intricate networks and multiple activities. *Nat Rev Cancer.* 2009; 9: 400-414.
  35. Willenbring H, Sharma AD, Vogel A, Lee AY, Rothfuss A, Wang Z, Finegold M, Grompe M. Loss of p21 permits carcinogenesis from chronically damaged liver and kidney epithelial cells despite unchecked apoptosis. *Cancer Cell.* 2008; 14: 59-67.
  36. Lehmann K, Tschuor C, Rickenbacher A, Jang JH, Oberkofler CE, Tschopp O, Schultze SM, Raptis DA, Weber A, Graf R, Humar B, Clavien PA. Liver failure after extended hepatectomy in mice is mediated by a p21-dependent barrier to liver regeneration. *Gastroenterology.* 2012; 143: 1609-1619.
  37. Zaika AI, Wei J, Noto JM, Peek RM. Microbial Regulation of p53 Tumor Suppressor. *PLoS Pathog.* 2015; 11: e1005099.
  38. Bieging KT, Mello SS, Attardi LD. Unravelling mechanisms of p53-mediated tumour suppression. *Nat Rev Cancer.* 2014; 14: 359-370.
  39. Urso L, Calabrese F, Favaretto A, Conte P, Pasello G. Critical review about MDM2 in cancer: Possible role in malignant mesothelioma and implications for treatment. *Crit Rev Oncol Hematol.* 2015; S1040-8428: 1-11.
  40. Biderman L, Manley JL, Prives C. Mdm2 and MdmX as Regulators of Gene Expression. *Genes Cancer.* 2012; 3: 264-273. doi: 10.1177/1947601912455331.
  41. Zhang Z, Wang H, Li M, Agrawal S, Chen X, Zhang R. MDM2 is a negative regulator of p21WAF1/CIP1, independent of p53. *J Biol Chem.* 2004; 279: 16000-16006.
  42. Eom TY, Joep RS. GSK3 beta N-terminus binding to p53 promotes its acetylation. *Mol Cancer.* 2009; 8: 14.
  43. Gao S, Brown J, Wang H, Feng X. The role of glycogen synthase kinase 3-beta in immunity and cell cycle: implications in esophageal cancer. *Arch Immunol Ther Exp (Warsz).* 2014; 62: 131-144.
  44. Hoeflich KP, Luo J, Rubie EA, Tsao MS, Jin O, Woodgett JR. Requirement for glycogen synthase kinase-3β in cell survival and NF-κB activation. *Nature.* 2000; 406: 86-90.
  45. Cao Q, Lu X, Feng YJ. Glycogen synthase kinase-3beta positively regulates the proliferation of human ovarian cancer cells. *Cell Res.* 2006; 16: 671-677.
  46. EI-Emshty HM, Saad EA, Toson EA, Abdel Malak CA, Gadelhak NA. Apoptosis and cell proliferation: correlation with BCL-2 and P53 oncoprotein expression in human hepatocellular carcinoma. *Hepatogastroenterology.* 2014; 61: 1393-1401.
  47. Belkhir A, Dar AA, Zaika A, Kelley M, El-Rifai W. t-Darpp promotes cancer cell survival by up-regulation of Bcl2 through Akt-dependent mechanism. *Cancer Res.* 2008; 68: 395-403.
  48. Ummanni R, Teller S, Junker H, Zimmermann U, Venz S, Scharf C, Giebel J, Walther R. Altered expression of tumor protein D52 regulates apoptosis and migration of prostate cancer cells. *FEBS J.* 2008; 275: 5703-5713.
  49. Edge SB, Compton CC. The American Joint Committee on Cancer: the 7th edition of the AJCC cancer staging manual and the future of TNM. *Ann Surg Oncol.* 2010; 17: 1471-1474.
